# Supplementary material
Source: PubMed Central journal article supplement (PMC7001501)
Supplement: EMBR-21-e48052-s001.pdf [file EMBR-21-e48052-s001.pdf]

## Expanded View Figures

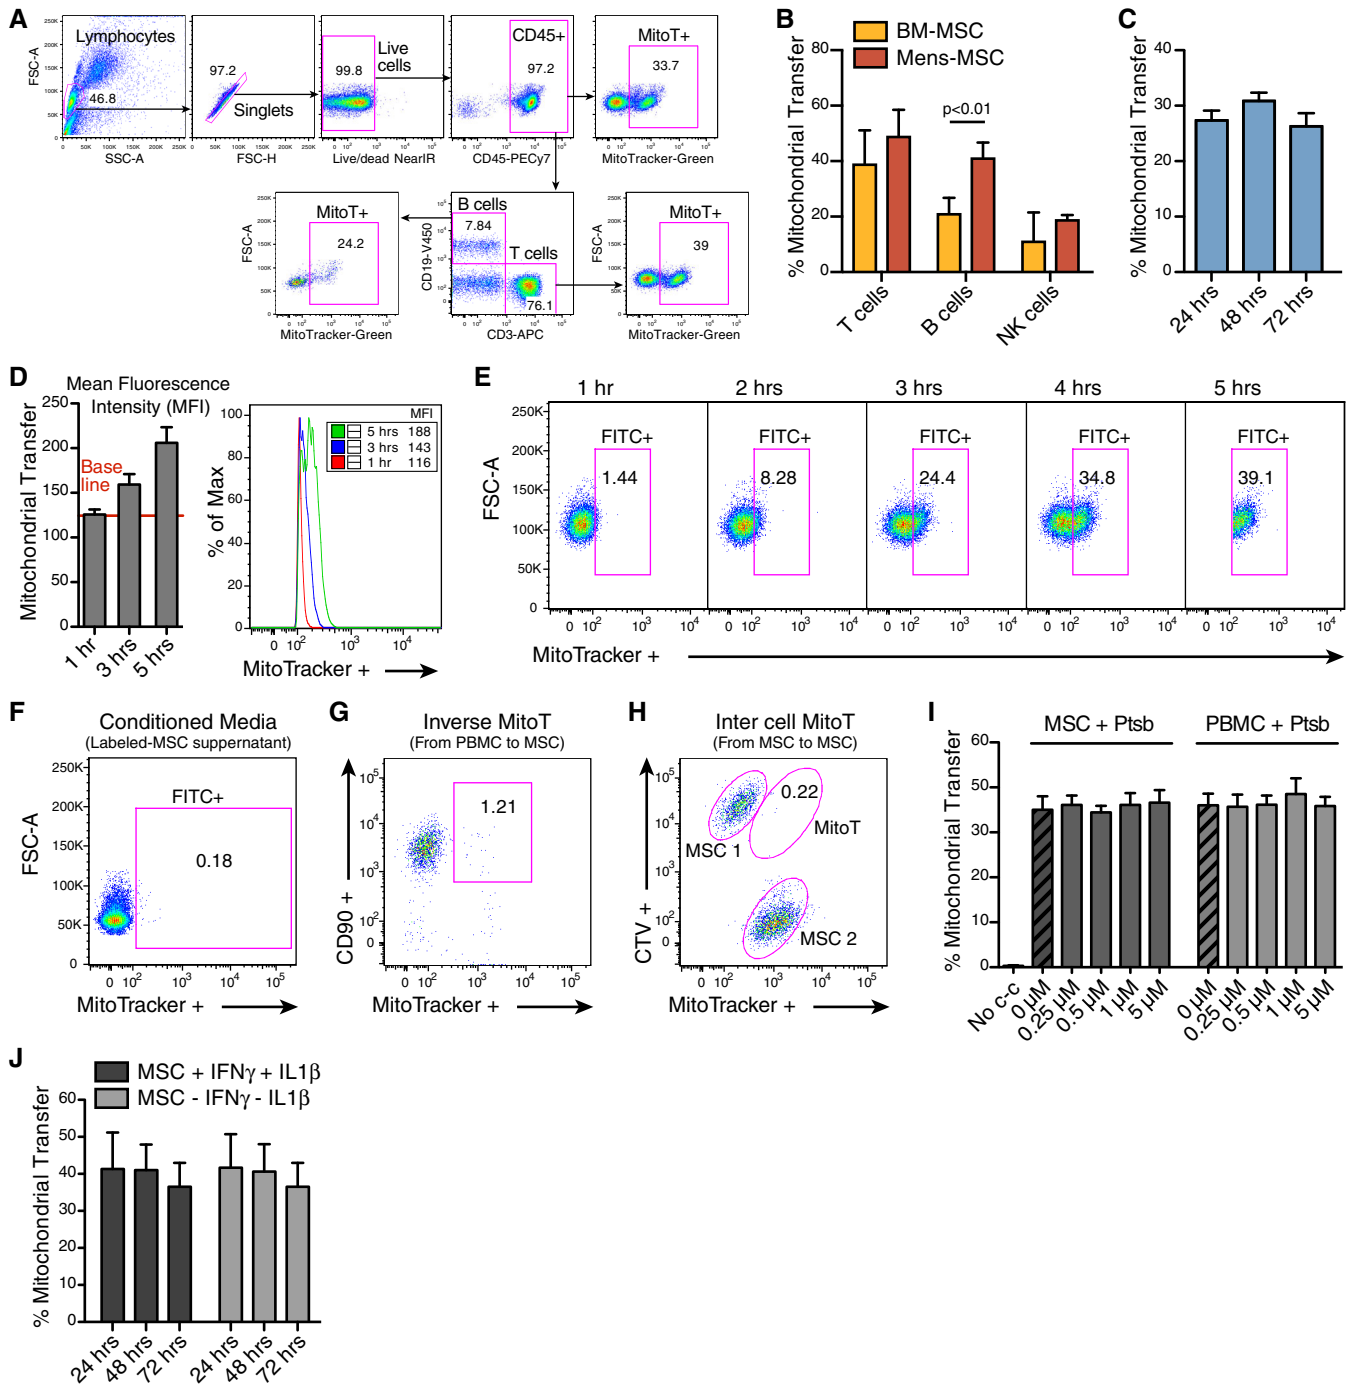

Figure EV1.

◀ **Figure EV1. Extended characterization of MitoT from MSC to lymphocytes.**

- A Representative gating strategy showing MitoT to different cell type populations analyzed.
- B FACS analysis of MitoT on T CD3<sup>+</sup> (*n* = 3), B CD19<sup>+</sup> (*n* = 3) and NK CD56<sup>+</sup> (*n* = 2) cells after 24 h co-culture with MitoGreen labeled bone marrow (BM) or menstrual (Mens) MSCs (ratio 1:25).
- C Percentage of MitoT on CD45<sup>+</sup> CD3<sup>+</sup> human cells after 1–3 days of co-culture with UC-MSCs (ratio 1:25) (*n* = 3 biological replicates).
- D Mean fluorescence intensity (MFI) of T CD3<sup>+</sup> MitoT<sup>pos</sup> cells after short times of co-culture with UC-MSCs. Average bar graph (*n* = 3, left panel) and representative FACS plot (right panel).
- E Representative FACS plots of MitoT on CD45<sup>+</sup> CD3<sup>+</sup> cells after short times of co-culture with MitoTracker Green labeled UC-MSCs.
- F Representative FACS plot, out of five independent experiments, on human CD3<sup>+</sup> cells cultured for 24 h with MitoGreen labeled UC-MSC supernatant.
- G Representative FACS analysis of MitoT from MitoTracker stained PBMC to CD90<sup>+</sup> UC-MSC, 24 h following the co-culture (ratio 1:25).
- H Representative FACS analysis of MitoT from MitoGreen stained MSC to CellTrace Violet (CTV) labeled MSC, after 24 h co-culture (ratio 1:1).
- I Percentage of MitoT on CD3<sup>+</sup> T cells from UC-MSCs or PBMCs pre-treated with increasing concentrations of the anti-oxidant Pterostilbene (Pstb), after 4 h co-culture (*n* = 2 biological replicates).
- J Percentage of MitoT on CD45<sup>+</sup> CD3<sup>+</sup> human cells after 1–3 days of co-culture with UC-MSCs (ratio 1:25) with or without pro-inflammatory licensing cytokines (*n* = 3 biological replicates).

Data information: All graphs show mean ± SEM and statistical analysis by Student's *t*-test.

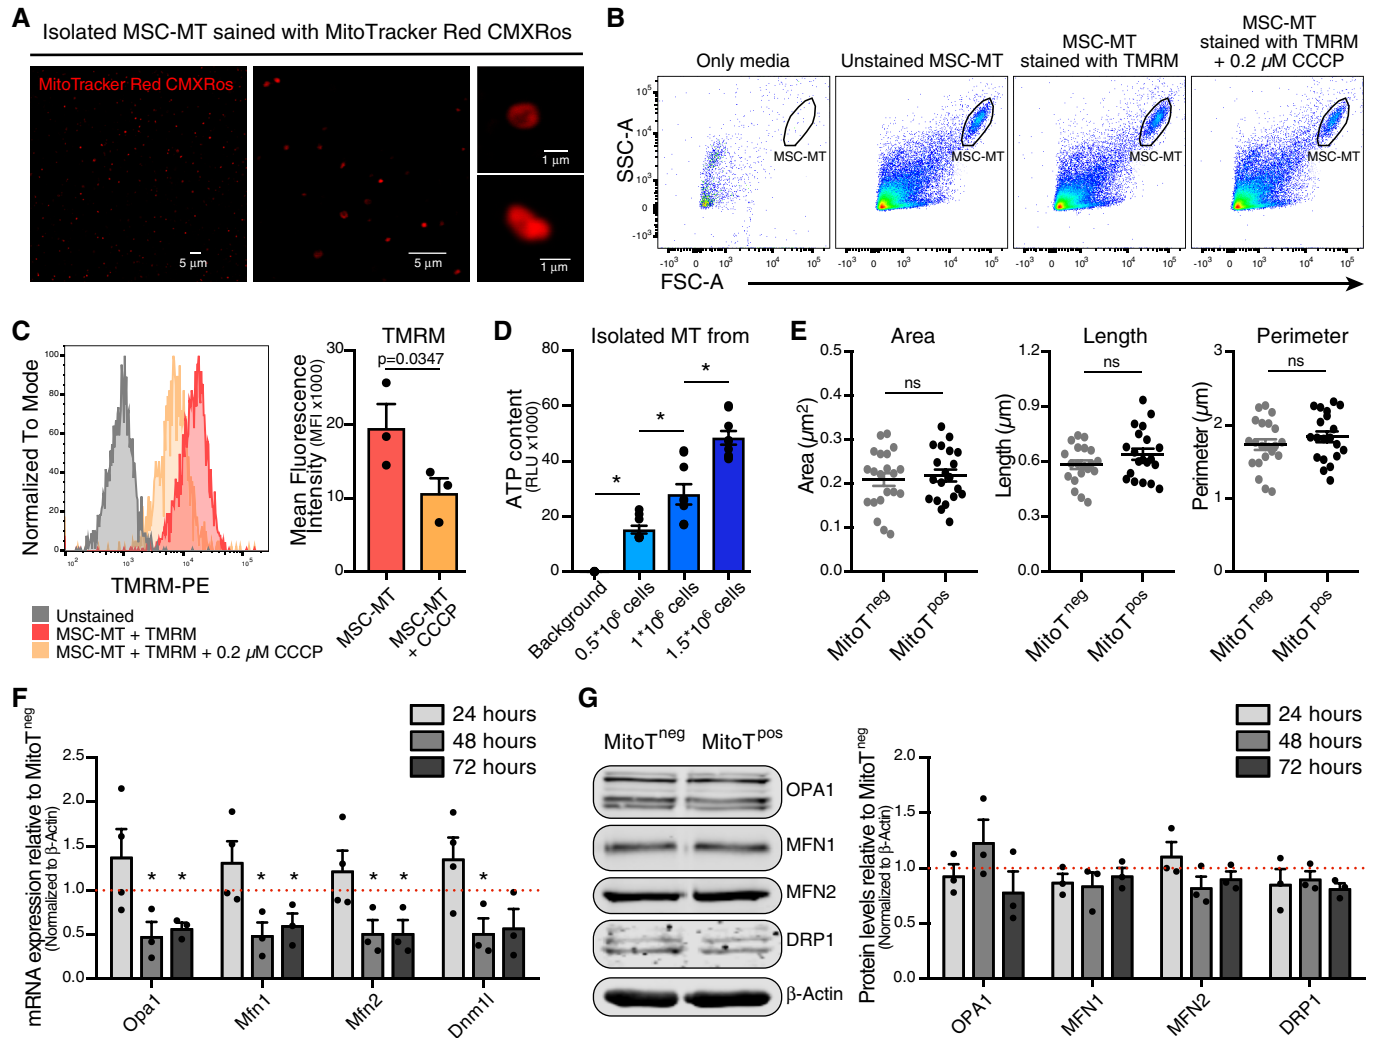

**Figure EV2. Characterization of MSC-derived mitochondria activity and fate. Functional assays on isolated MT.**

- A** Representative confocal microscopy of isolated MSC-MT stained with MitoTracker Red CMXRos at different magnifications (40 $\times$  left and middle panel, and 63 $\times$  right panels).
- B** Representative gating strategy showing isolated mitochondria from  $1 \times 10^5$  MSCs per condition by FACS.
- C** Mean fluorescence intensity (MFI) of TMRM dye on unstained MSC-MT, MSC-MT stained with TMRM or MSC-MT stained with TMRM previously treated with 0.2  $\mu$ M of CCCP (carbonyl cyanide 3-chlorophenylhydrazone). Representative FACS plot (left panel) and average of MFI ( $n = 3$  biological replicates, with three different UC-MSCs) (right panel).
- D** ATP production of isolated MSC-MT from increasing amounts of MSC cells ( $n = 3$  biological replicates run in triplicates). Graph shows mean  $\pm$  SEM and statistical analysis by one-way ANOVA with Tukey's post-test.
- E** Analysis of mitochondrial morphology parameters of human MT in sorted CD3 $^+$  MitoT $^{neg}$  and MitoT $^{pos}$  cells after Mitoception with UC-MSCs, by transmission electron microscopy ( $n = 20$  independent cells analyzed per group).
- F** qRT-PCR analysis of genes related to mitochondrial fusion/fission in FACS-sorted CD3 $^+$  MitoT $^{neg}$  and CD3 $^+$  MitoT $^{pos}$  cells from healthy human PBMCs ( $n = 3$  biological replicates, with three different donors of PBMCs), after 24, 48 and 72 h post Mitoception. The graph depicts fold expression in CD3 $^+$  MitoT $^{pos}$  cells relative to CD3 $^+$  MitoT $^{neg}$  cells, which are set at 1 (red dotted line).
- G** Western Blot analysis of protein levels related to mitochondrial fusion/fission in FACS-sorted CD3 $^+$  MitoT $^{neg}$  and CD3 $^+$  MitoT $^{pos}$  cells from healthy human PBMCs. Representative blots at 24 h post Mitoception (left panel) and bar graph showing 24, 48 and 72 h post Mitoception (right panel) ( $n = 3$  biological replicates, with three different donors of PBMCs). The graph depicts fold expression in CD3 $^+$  MitoT $^{pos}$  cells relative to CD3 $^+$  MitoT $^{neg}$  cells, which are set at 1.
- Data information: Graphs show mean  $\pm$  SEM and statistical analysis by Student's  $t$ -test.

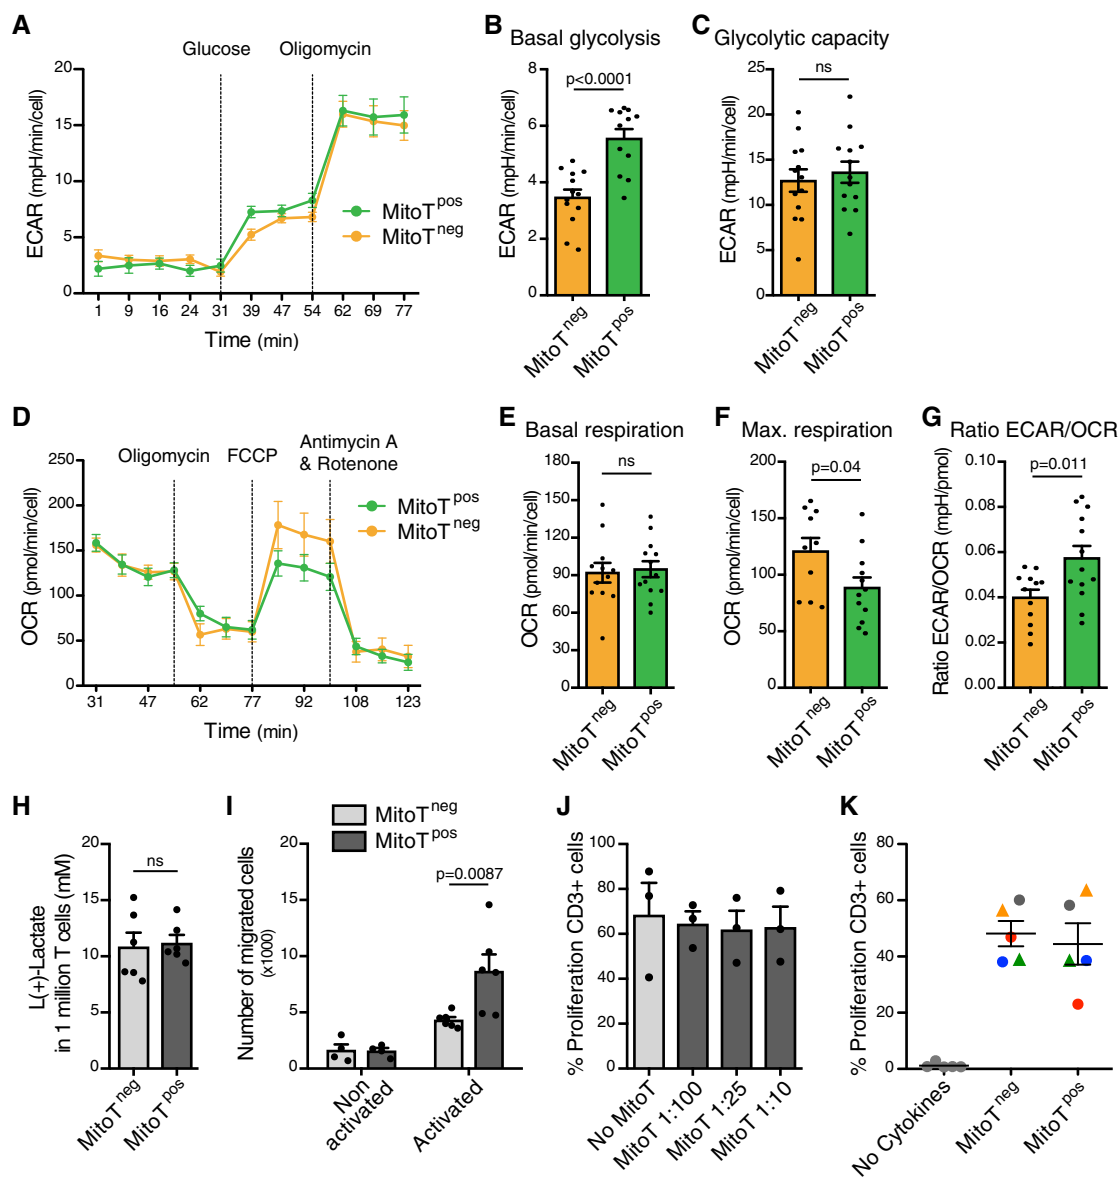

**Figure EV3. Functional analysis of MitoT on CD3<sup>+</sup> T cells. Metabolic changes, transmigration capacity and proliferation analysis on MitoT<sup>pos</sup> cells.**

A–C Extracellular Acidification Rate (ECAR) analysis measured in a Seahorse XFP extracellular flux analyzer in FACS-sorted MitoT<sup>pos</sup> and MitoT<sup>neg</sup> CD3<sup>+</sup> T cells mitocaptured with UC-MSC mitochondria ( $n = 3$  biological replicates, ran in quadruplicates).

D–F Oxygen Consumption Rate (OCR) analysis measured in a Seahorse XFP extracellular flux analyzer in FACS-sorted MitoT<sup>pos</sup> and MitoT<sup>neg</sup> CD3<sup>+</sup> T cells mitocaptured with UC-MSC mitochondria ( $n = 3$  biological replicates, ran in quadruplicates).

G Glycolysis/OXPHOS ratio on FACS-sorted MitoT<sup>pos</sup> and MitoT<sup>neg</sup> CD3<sup>+</sup> T cells mitocaptured with UC-MSC-MT ( $n = 3$  biological replicates, ran in quadruplicates).

H L(+)-Lactate concentrations from supernatants of sorted CD3<sup>+</sup> MitoT<sup>neg</sup> and MitoT<sup>pos</sup> T cells, previously mitocaptured with UC-MSC-MT ( $n = 2$  biological replicates, each one in triplicate).

I Number of migrated CD4<sup>+</sup> MitoT<sup>neg</sup> and MitoT<sup>pos</sup> sorted T cells from 100,000 cells seeded on media non-activated or activated with anti-CD3 and IL-2 for 3 days ( $n = 3$  biological replicates, in duplicates).

J Percentage of CD3<sup>+</sup> T cell proliferation after increasing Mitocapture ratios, quantified by measuring the corresponding decrease in CellTrace Violet (CTV) proliferation dye intensity by flow cytometry ( $n = 3$  biological replicates with three different PBMC donors).

K Percentage of proliferation of FACS-sorted MitoT<sup>neg</sup> and MitoT<sup>pos</sup> CD3<sup>+</sup> cells, after 5 days in culture with anti-CD3/CD28 beads (1/20) and IL-2 (50 U/ml) in the presence or absence of PHA (15  $\mu$ g/ml) (round or triangle dots respectively) ( $n = 5$  biological replicates with five different PBMC donors).

Data information: All graphs show mean  $\pm$  SEM and statistical analysis by Student's *t*-test.

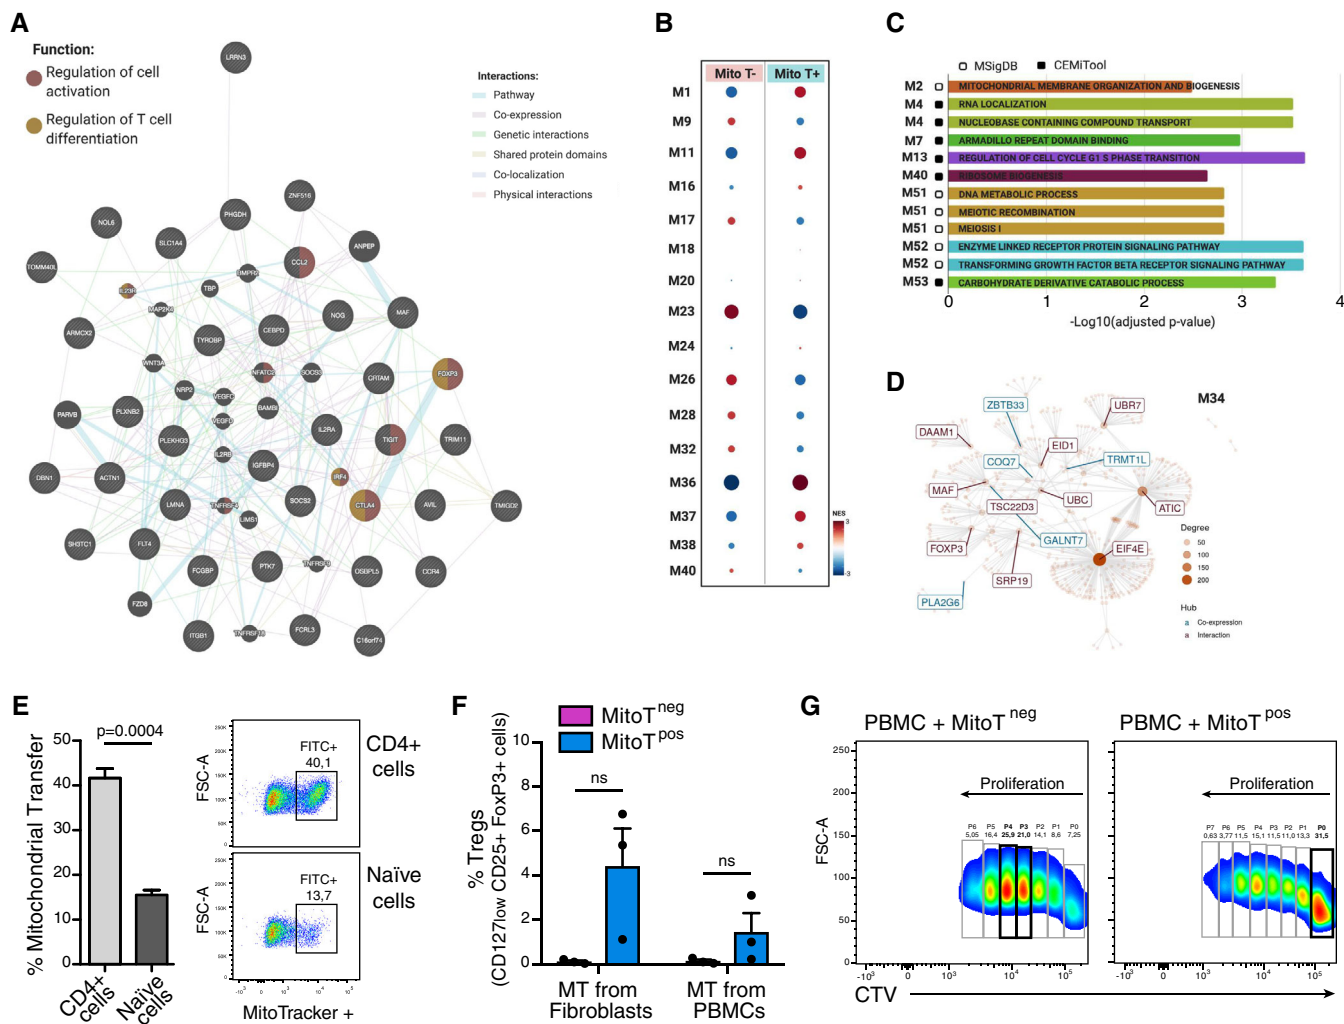

**Figure EV4. MitoT-driven Treg differentiation. Analysis of gene set enrichment of RNA-Seq data.**

- A Interaction network from FOXP3-associated DE coding genes in sorted MitoTposCD3<sup>+</sup> compared to MitoTnegCD3<sup>+</sup> T cells ( $n = 4$  different donors of PBMCs), using Genemania.
- B Gene Set Enrichment Analysis (GSEA) of co-expressed modules identified by webCEMiTool showing, the enriched module activity between sorted MitoTpos and MitoTnegCD3<sup>+</sup> T cells (from 4 different donors of PBMCs).
- C Top over-represented functional categories according to webCEMiTool and MSigDB, identified co-expressed gene modules.
- D Gene co-expression/interaction networks of module 34 (M34) displaying FOXP3 as hub gene.
- E FACS analysis of MitoT on CD4<sup>+</sup> and naïve (CD4<sup>+</sup> CD45RA<sup>+</sup> CD45RO<sup>-</sup>) T cells after Mitoception with UC-MSc mitochondria, represented as bar graph (left panel,  $n = 3$  biological replicates) and representative FACS plot (right panel). Graph shows mean  $\pm$  SEM and statistical analysis by Student's  $t$ -test.
- F FACS analysis of Treg induction after 5–7 days differentiation in plain media of FACS-sorted CD4<sup>+</sup> naïve MitoTneg and MitoTpos cells previously mitocaptured with Fibroblasts or same donor PBMCs mitochondria ( $n = 3$  biological replicates for each condition).
- G Representative proliferation FACS plots of CTV-stained PBMC co-cultured with MitoTneg or MitoTpos cells (ratio 1:1) after 5–7 days of CD4<sup>+</sup> naïve cell activation with differentiation media.

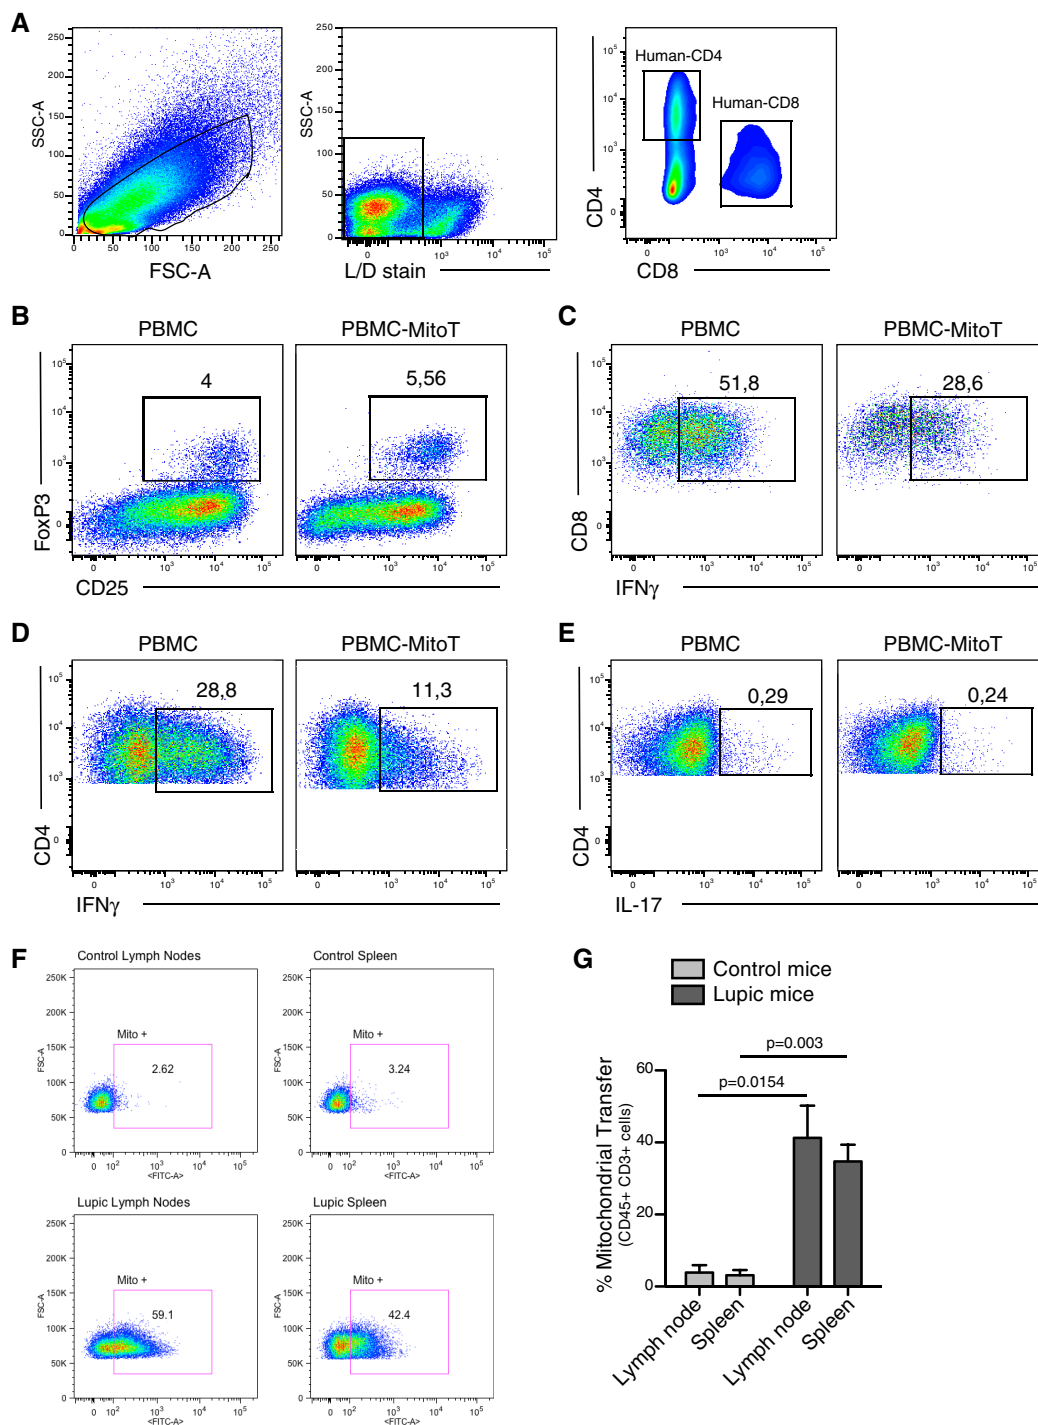

**Figure EV5. Efficient *ex vivo* MitoT in inflammatory T cells isolated from a SLE mouse model.**

A–E Representative gating strategy used for the *in vivo* analyses. Representative FACS plots of (B) Tregs (FoxP3<sup>+</sup> CD25<sup>+</sup>), (C) T cytotoxic (CD8<sup>+</sup> IFN $\gamma$ <sup>+</sup>), (D) T helper 1 (CD4<sup>+</sup> IFN $\gamma$ <sup>+</sup>) and (E) T helper 17 (CD4<sup>+</sup> IL17<sup>+</sup>) populations cell engraftment in mouse spleen following transplantation of mitocyped or control PBMC cells.

F Representative FACS plot, out of 3 independent experiments, on MRL/MpJ/Fas mouse CD45<sup>+</sup> CD3<sup>+</sup> cells from spleen or lymph nodes co-cultured for 24 h with MitoGreen labeled UC-MSCs.

G FACS analysis of *ex vivo* MitoT from labeled UC-MSCs to MRL/MpJ/Fas (lupic) or MRL/MpJ (control) mouse CD45<sup>+</sup> CD3<sup>+</sup> cells from spleen or lymph nodes (n = 3 biological replicates). Graph shows mean  $\pm$  SEM and statistical analysis by Student's *t*-test.
